# Supplementary material
Source: publisher site journal article supplement (https://www.spandidos-publications.com/6965/downloadSupplementary)
Supplement: Supplementary file 1 [file downloadSupplementary]

## Sheet: Sheet1
Table SV. Down-regulated genes 6 h after LIPUS (low-intensity pulsed ultrasound) exposure.
Gene symbol	Fold-change	p value	TPM (Transcripts per million reads)						Gene title
			Ctr-1	Ctr-2	Ctr-3	LIPUS-1	LIPUS-2	LIPUS-3
PCDHGA8	0.231	0.037	9.648	9.957	12.307	6.138	0	2.371	protocadherin gamma subfamily A, 8(PCDHGA8)
EOLA1	0.359	0.005	4.935	5.151	5.727	1.902	2.72	1.305	endothelium and lymphocyte associated ASCH domain 1(EOLA1)
MRPS7	0.363	0.018	5.016	2.933	1.807	1.139	1.116	0.926	mitochondrial ribosomal protein S7(mrps7)
SRD5A3	0.383	0.034	4.512	3.876	2.002	0.972	1.975	0.558	steroid 5 alpha-reductase 3(srd5a3)
SSC5D	0.389	0.001	8.639	6.612	9.046	3.116	3.492	2.788	scavenger receptor cysteine rich family member with 5 domains(SSC5D)
ST8SIA1	0.398	0.001	4.581	3.417	3.889	1.651	1.599	1.451	ST8 alpha-N-acetyl-neuraminide alpha-2,8-sialyltransferase 1(ST8SIA1)
MYT1.S	0.401	0.016	3.19	3.642	2.834	0.667	0.88	2.12	myelin transcription factor 1 S homeolog(myt1.S)
DLC	0.416	0.02	4.209	3.388	4.153	1.773	0.937	2.397	deltaC(dlc)
ACSL6	0.417	0.001	3.216	3.45	4.265	1.477	1.449	1.603	acyl-CoA synthetase long-chain family member 6(Acsl6)
CNFN	0.421	0.008	22.575	16.263	21.49	10	5.916	9.931	cornifelin(cnfn)
DLX4A	0.428	0.001	12.617	11.205	10.487	4.96	5.239	4.463	distal-less homeobox 4a(dlx4a)
GALNT18	0.431	0.044	4.847	3.71	6.316	1.189	2.972	2.574	polypeptide N-acetylgalactosaminyltransferase 18(GALNT18)
PAPOLB	0.433	0.046	2.801	3.521	5.56	0.805	2.352	1.894	poly(A) polymerase beta(PAPOLB)
TMPRSS2	0.454	0.012	3.539	1.882	2.166	1.267	1.068	0.839	transmembrane serine protease 2(TMPRSS2)
IL20RB	0.461	0.019	2.889	3.38	3.117	2.181	1.368	0.921	interleukin 20 receptor subunit beta(IL20RB)
TRIM37	0.462	0.019	2.097	3.997	3.623	1.752	1.181	1.45	tripartite motif containing 37(TRIM37)
MSLNL	0.465	0.005	43.129	43.014	51.795	16.763	20.822	27.686	mesothelin-like(Mslnl)
IGKC	0.467	0.004	3.025	2.911	3.067	1.442	1.066	1.791	immunoglobulin kappa constant(IGKC)
LOC105940029	0.478	0.006	5.171	6.34	4.093	2.348	2.109	2.955	cytochrome P450 3A56(LOC105940029)
MAMLD1	0.478	0.022	7.299	4.78	4.436	2.981	1.836	3.086	mastermind like domain containing 1(MAMLD1)
IL17REL	0.479	0.014	1.906	2.974	2.778	1.609	0.869	1.076	interleukin 17 receptor E like(IL17REL)
TRP53BP1	0.481	0.004	2.639	1.689	2.503	1.128	0.823	1.103	transformation related protein 53 binding protein 1(Trp53bp1)
CTDP1	0.49	0.02	5.247	10.885	8.275	4.071	3.851	3.546	CTD (carboxy-terminal domain, RNA polymerase II, polypeptide A) phosphatase, subunit 1(Ctdp1)
FZD7	0.497	0.039	2.312	3.233	2.152	0.375	1.969	0.665	frizzled class receptor 7(FZD7)
MEX3A	0.5	0.01	13.355	8.354	10.165	4.994	4.462	6.345	mex-3 RNA binding family member A(MEX3A)
SOWAHB	0.5	0.025	3.242	3.021	1.923	1.102	1.197	1.788	sosondowah ankyrin repeat domain family member B(SOWAHB)
FBF1	0.502	0.039	5.952	4.528	2.766	2.305	2.444	1.674	Fas (TNFRSF6) binding factor 1(Fbf1)
EML6	0.502	0.022	3.347	5.484	4.922	3.051	1.996	1.878	echinoderm microtubule associated protein like 6(Eml6)
CALPA	0.507	0.017	4.071	4.395	4.843	2.803	2.61	1.547	Calpain-A(CalpA)
RGD1305713	0.511	0.026	2.514	3.361	3.195	1.688	1.045	2.048	similar to RIKEN cDNA 3110040N11(RGD1305713)
ATAT1	0.512	0.001	1.89	1.864	2.112	0.102	0.492	0	alpha tubulin acetyltransferase 1(atat1)
VWF	0.515	0.049	1.566	2.906	2.719	0.71	1.69	0.874	von Willebrand factor(VWF)
SH3TC2	0.522	0.046	3.156	5.484	4.643	3.283	1.751	1.985	SH3 domain and tetratricopeptide repeats 2(Sh3tc2)
SNED1	0.526	0.024	44.288	54.88	31.083	24.351	25.69	17.543	sushi, nidogen and EGF-like domains 1(Sned1)
FHIP1A	0.529	0.041	17.146	26.567	13.184	11.742	9.86	7.658	FHF complex subunit HOOK interacting protein 1A(FHIP1A)
KLHDC1	0.529	0.001	16.34	16.726	13.337	8.379	8.082	7.964	kelch domain containing 1(Klhdc1)
IMMP2L	0.529	0.002	1.514	2.153	2.067	0.61	0.88	0.618	inner mitochondrial membrane peptidase subunit 2(immp2l)
MEGF6	0.533	0.006	5.405	6.194	7.57	3.555	2.797	3.856	multiple EGF like domains 6(MEGF6)
MBOAT1	0.536	0.003	3.977	4.778	4.573	2.641	2.611	1.936	membrane bound O-acyltransferase domain containing 1(Mboat1)
AP5M1	0.545	0.031	2.865	5.41	3.871	1.779	2.166	2.518	adaptor related protein complex 5 subunit mu 1(AP5M1)
CACNA1B	0.547	0.048	5.317	5.817	5.772	2.102	2.929	4.751	calcium channel, voltage-dependent, N type, alpha 1B subunit(Cacna1b)
POLA2	0.551	0.001	3.105	2.628	3.232	1.603	1.623	1.699	polymerase (DNA directed), alpha 2(Pola2)
AGBL5	0.552	0.001	2.362	2.383	2.305	1.301	1.26	1.333	AGBL carboxypeptidase 5(agbl5)
GRAMD1A	0.554	0.049	2.792	1.711	2.892	1.344	0.96	1.75	GRAM domain containing 1A(Gramd1a)
HOXA13B	0.558	0.013	5.883	4.104	4.198	3.192	2.286	2.407	homeobox A13b(hoxa13b)
RFX3	0.561	0.012	13.579	9.045	13.267	5.876	6.516	7.507	regulatory factor X, 3 (influences HLA class II expression)(rfx3)
ZNF24	0.563	0.02	1.767	2.787	2.102	0	1.475	1.253	zinc finger protein 24(ZNF24)
RAD51C	0.57	0.017	2.232	1.403	2.118	1.229	0.814	0.715	RAD51 paralog C(RAD51C)
RGS22	0.574	0.038	2.573	1.89	2.179	0.174	1.807	1.109	regulator of G protein signaling 22(RGS22)
BICC1	0.579	0.021	2.195	1.87	1.255	0.995	0.102	0.346	BicC family RNA binding protein 1(Bicc1)
HOMEZ	0.58	0.042	7.559	9.736	8.354	3.504	5.032	6.805	homeobox and leucine zipper encoding(Homez)
ADRA2A	0.581	0.001	1.486	1.95	1.787	0.253	1.017	0.868	adrenoceptor alpha 2A(adra2a)
TSC2	0.583	0.025	9.889	12.282	15.096	6.037	9.086	6.635	TSC complex subunit 2(TSC2)
KHNYN	0.583	0.023	14.653	8.766	11.572	5.746	7.553	6.801	KH and NYN domain containing(KHNYN)
SLC25A34	0.585	0.012	7.366	8.194	10.3	5.782	4.119	5.223	solute carrier family 25 member 34(slc25a34)
CCNL2	0.586	0.048	8.846	6.836	7.326	5.589	3.014	5.282	cyclin L2(ccnl2)
ASB13	0.587	0.014	2.222	2.751	2.398	1.329	1.857	1.2	ankyrin repeat and SOCS box-containing 13(Asb13)
NEU1	0.588	0.001	9.285	10.121	11.305	6.496	5.661	5.869	neuraminidase 1(NEU1)
BFAR	0.588	0.007	13.277	12.913	15.415	7.918	6.882	9.871	bifunctional apoptosis regulator(Bfar)
TMEM238	0.59	0.012	20.116	14.442	18.787	12.394	9.024	10.008	transmembrane protein 238(Tmem238)
PIDD1	0.59	0.045	3.23	3.83	5.826	3.024	2.198	2.225	p53 induced death domain protein 1(Pidd1)
SCUBE2	0.59	0.002	2.018	1.617	1.49	0.288	0.964	0.762	signal peptide, CUB domain, EGF-like 2(scube2)
PIGW	0.59	0.018	2.396	3.53	2.234	1.76	1.526	1.447	phosphatidylinositol glycan anchor biosynthesis class W(PIGW)
RAB23	0.591	0.027	7.995	6.564	4.779	3.175	3.84	4.254	RAB23, member RAS oncogene family(RAB23)
PLEKHG7	0.593	0.001	4.159	4.357	4.895	2.813	2.671	2.459	pleckstrin homology and RhoGEF domain containing G7(PLEKHG7)
INFB	0.595	0.049	1.43	2.596	1.396	1.094	0.815	0.646	Translation initiation factor IF-2(infB)
SPATA13	0.596	0.017	5.382	3.572	4.787	2.338	2.646	3.149	spermatogenesis associated 13(Spata13)
MPP7A	0.596	0.001	5.372	5.896	6.361	3.751	3.463	3.287	MAGUK p55 scaffold protein 7a(mpp7a)
SLC12A1	0.597	0.017	5.16	5.621	4.276	2.729	2.548	3.802	solute carrier family 12, member 1(Slc12a1)
FABD	0.603	0.009	19.334	14.162	17.832	11.489	8.849	10.537	malonyl CoA:acyl carrier protein transacylase(fabD)
GALNT8	0.604	0.012	2.205	2.146	1.985	1.351	1.533	0.909	polypeptide N-acetylgalactosaminyltransferase 8(GALNT8)
ZBTB8A	0.606	0.021	2.227	1.927	2.176	1.254	1.658	0.915	zinc finger and BTB domain containing 8a(Zbtb8a)
MACIR	0.607	0.014	3.126	3.004	2.267	1.538	1.539	2.011	macrophage immunometabolism regulator(macir)
HAUS2	0.608	0.042	2.361	2.589	3.194	2.275	1.378	1.401	HAUS augmin like complex subunit 2(HAUS2)
SFT2D2	0.608	0.038	24.248	21.285	13.52	11.697	10.793	12.443	SFT2 domain containing 2(SFT2D2)
SOX9	0.609	0.012	20.122	15.23	16.978	12.797	9.172	10.005	SRY-box 9(SOX9)
KCNK3	0.609	0.001	1.712	1.611	1.83	0.719	1.143	0	potassium two pore domain channel subfamily K member 3(KCNK3)
CCDC138	0.611	0.004	1.685	2.121	1.636	1.184	1.126	1	coiled-coil domain containing 138(Ccdc138)
COBLL1	0.612	0.003	15.822	16.244	18.086	10.777	11.398	8.693	Cobl-like 1(Cobll1)
AVIL	0.613	0.002	8.694	8.84	7.254	4.851	4.82	5.493	advillin(AVIL)
SRSF1	0.617	0.039	27.55	34.696	38.41	20.922	15.688	26.273	serine and arginine rich splicing factor 1(SRSF1)
CD6	0.619	0.008	3.538	3.609	3.877	2.202	1.917	2.776	CD6 molecule(CD6)
CACNG4	0.62	0.035	1.237	2.216	1.528	0	0.083	0.432	calcium voltage-gated channel auxiliary subunit gamma 4(Cacng4)
TXNL4B	0.621	0.05	2.166	2.411	1.592	1.214	0.791	1.639	thioredoxin-like 4B(Txnl4b)
GPR4	0.621	0.001	6.046	6.704	6.653	3.736	3.832	4.52	G protein-coupled receptor 4(GPR4)
ZNF112	0.624	0.027	3.051	5.005	3.652	2.549	2.481	2.144	zinc finger protein 112(ZNF112)
PCDH17	0.624	0.036	5.944	4.165	3.525	2.398	2.972	2.976	protocadherin 17(PCDH17)
BRAF	0.624	0.046	7.164	4.14	5.031	3.489	2.791	3.73	B-Raf proto-oncogene, serine/threonine kinase(BRAF)
SLC15A1	0.624	0.016	2.168	3.143	2.916	1.477	1.781	1.838	solute carrier family 15 member 1(Slc15a1)
DZIP1L	0.628	0.042	2.68	2.21	1.642	1.627	1.148	1.292	DAZ interacting zinc finger protein 1-like(dzip1l)
LEO1	0.63	0.02	30.325	46.523	43.946	24.829	26.599	23.459	LEO1 homolog, Paf1/RNA polymerase II complex component(leo1)
SRPK2	0.632	0.022	15.992	10.334	12.076	8.503	7.003	8.456	serine/arginine-rich protein specific kinase 2(Srpk2)
CAPN9	0.634	0.001	92.76	93.974	87.408	55.662	60.697	57.48	calpain 9(CAPN9)
PRSS30	0.635	0.027	10.116	7.3	10.778	5.011	6.744	6.04	protease, serine, 30(Prss30)
AZGP1	0.635	0.001	8.288	6.862	8.017	5.06	4.791	4.826	alpha-2-glycoprotein 1, zinc-binding(AZGP1)
FOXI4.1.L	0.639	0.024	2.587	3.623	2.513	1.748	1.642	2.14	forkhead box I4, gene 1 L homeolog(foxi4.1.L)
NDUFA6	0.641	0.003	38.007	30.45	38.944	24.011	22.839	21.615	NADH dehydrogenase [ubiquinone] 1 alpha subcomplex subunit 6(NDUFA6)
ZBTB16A	0.642	0.003	27.703	31.918	34.421	21.013	18.124	21.136	zinc finger and BTB domain containing 16a(zbtb16a)
TMEM175	0.642	0.015	5.578	5.8	6.213	3.156	3.581	4.705	transmembrane protein 175(tmem175)
DLG5	0.645	0.004	17.728	19.35	22.729	12.507	11.927	14.046	discs large MAGUK scaffold protein 5(Dlg5)
RBBP8NL	0.645	0.014	8.711	7.238	9.586	5.61	4.65	6.228	RBBP8 N-terminal like(RBBP8NL)
FAM169A	0.646	0.035	4.103	5.417	4.303	3.196	2.296	3.518	family with sequence similarity 169 member A(FAM169A)
MYCLA	0.647	0.028	9.927	8.362	9.642	6.683	4.601	7.064	MYCL proto-oncogene, bHLH transcription factor a(mycla)
KLF8	0.648	0.003	21.297	22.779	23.472	14.048	13.131	16.805	Kruppel-like factor 8(Klf8)
ZK1290.5	0.65	0.01	1.986	2.351	2.789	1.49	1.443	1.662	putative oxidoreductase ZK1290.5(ZK1290.5)
CYP4F3	0.655	0.021	5.502	5.975	6.293	4.73	3.986	3.089	cytochrome P450 family 4 subfamily F member 3(CYP4F3)
SIAE	0.655	0.001	2.681	2.278	2.634	1.551	1.668	1.75	sialic acid acetylesterase(Siae)
GGT7	0.657	0.005	15.83	15.441	12.129	9.726	9.258	9.33	gamma-glutamyltransferase 7(Ggt7)
TMC4	0.659	0.001	1.465	1.461	1.636	0.467	0.226	0.923	transmembrane channel like 4(TMC4)
RXRGA	0.66	0.008	10.942	9.14	7.797	6.235	6.041	5.94	retinoid x receptor, gamma a(rxrga)
NTPCR	0.662	0.001	1.572	1.694	1.509	1.164	0.801	0.696	nucleoside-triphosphatase, cancer-related(NTPCR)
SLC25A37	0.662	0.012	16.349	13.324	13.078	10.24	10.137	7.974	solute carrier family 25 member 37(slc25a37)
BTC	0.665	0.044	2.034	2.169	1.707	1.378	0.984	1.605	betacellulin, epidermal growth factor family member(Btc)
NOS2	0.665	0.002	1.727	1.407	1.398	0.909	0.472	0.802	nitric oxide synthase 2(NOS2)
ZGC:162193	0.667	0.046	40.977	34.076	30.909	27.614	25.833	17.933	zgc:162193(zgc:162193)
TMEM64	0.667	0.044	3.478	2.73	3.935	2.478	1.783	2.513	transmembrane protein 64(TMEM64)
ILKAP	0.667	0.018	2.741	2.447	2.971	1.478	2.088	1.917	ILK associated serine/threonine phosphatase(ILKAP)
FHDC1	0.668	0.005	14.571	12.6	15.691	8.88	10.592	9.11	FH2 domain containing 1(Fhdc1)
SAMHD1	0.668	0.01	49.232	53.168	60.004	35.055	31.734	42.093	SAM domain and HD domain 1(samhd1)
CCDC127	0.671	0.039	5.258	7.126	4.692	4.29	3.787	3.265	coiled-coil domain containing 127(Ccdc127)
MMD	0.671	0.012	11.21	14.96	11.772	9.005	7.609	8.717	monocyte to macrophage differentiation-associated(Mmd)
KDM1B	0.673	0.016	6.719	6.096	6.193	5.143	3.541	4.242	lysine (K)-specific demethylase 1B(Kdm1b)
PNPLA2	0.674	0.002	15.226	14.625	16.166	11.111	9.305	10.668	patatin-like phospholipase domain containing 2(Pnpla2)
SH3RF2	0.676	0.019	1.807	1.894	2.199	1.091	1.389	1.532	SH3 domain containing ring finger 2(Sh3rf2)
CLCN2	0.676	0.024	8.774	6.604	8.232	6.235	4.565	5.174	chloride voltage-gated channel 2(Clcn2)
MBOAT2	0.677	0.033	20.054	13.355	14.77	10.954	9.551	11.748	membrane bound O-acyltransferase domain containing 2(MBOAT2)
FEM1B	0.678	0.044	18.447	15.896	16.353	9.048	14.762	11.192	fem-1 homolog B(Fem1b)
TMEM187	0.678	0.001	1.388	1.62	1.424	0.984	0.951	0.828	transmembrane protein 187(TMEM187)
ZBTB7A	0.681	0.014	38.985	32.702	28.966	22.008	20.878	25.363	zinc finger and BTB domain containing 7A(ZBTB7A)
ADGRG2	0.682	0.004	20.247	17.563	16.746	13.26	11.345	12.583	adhesion G protein-coupled receptor G2(Adgrg2)
RFX2	0.683	0.016	12.82	11.614	10.954	6.702	8.266	9.376	regulatory factor X, 2 (influences HLA class II expression)(rfx2)
HERC1	0.684	0.001	22.536	22.212	23.937	15.742	15.074	16.156	HECT and RLD domain containing E3 ubiquitin protein ligase family member 1(HERC1)
ZNF628	0.685	0.017	11.032	14.822	11.897	9.472	8.625	7.638	zinc finger protein 628(ZNF628)
KIAA0408	0.685	0.005	1.679	1.613	2.058	1.189	1.197	1.26	KIAA0408(KIAA0408)
SEPHS1	0.686	0.027	2.381	2.52	3.284	1.602	1.956	2.029	selenophosphate synthetase 1(sephs1)
TFR2	0.686	0.007	1.811	1.963	1.973	1.152	1.517	1.295	transferrin receptor 2(Tfr2)
LOC109643480	0.686	0.024	3.832	3.982	4.929	2.537	2.784	3.436	thyroid hormone receptor alpha-B(LOC109643480)
ZBTB7B	0.686	0.013	32.871	24.652	28.174	20.271	17.456	20.858	zinc finger and BTB domain containing 7B(ZBTB7B)
PDK1	0.686	0.002	13.315	13.344	13.185	10.254	8.684	8.509	pyruvate dehydrogenase kinase 1(PDK1)
NEB	0.687	0.05	12.037	16.459	18.963	11.623	9.391	11.178	nebulin(NEB)
CCDC88B	0.687	0.039	5.577	4.55	6.642	4.232	4.025	3.214	coiled-coil domain containing 88B(CCDC88B)
ZNF567	0.688	0.027	9.404	11.416	9.942	6.336	6.271	8.747	zinc finger protein 567(ZNF567)
POU6F1	0.688	0.043	3.954	6.039	4.542	2.924	3.276	3.691	POU class 6 homeobox 1(pou6f1)
CCDC88C	0.689	0.046	16.492	11.829	15.032	9.749	11.898	8.256	coiled-coil domain containing 88C(ccdc88c)
NDUFC2	0.689	0.026	151.594	104.915	120.363	95.155	78.832	83.513	NADH dehydrogenase [ubiquinone] 1 subunit C2(NDUFC2)
PI4KA	0.697	0.048	31.966	44.255	28.241	24.106	25.683	21.844	phosphatidylinositol 4-kinase alpha(Pi4ka)
RNF169	0.697	0.031	4.428	5.353	6.474	3.343	4.024	3.866	ring finger protein 169(rnf169)
KHDC4	0.7	0.009	72.249	65.265	83.828	56.159	48.118	50.201	KH domain containing 4, pre-mRNA splicing factor(Khdc4)
LRATD1	0.703	0.036	11.404	8.449	10.143	8.137	7.049	5.932	LRAT domain containing 1(Lratd1)
TLE4	0.704	0.015	6	6.322	5.028	4.305	3.525	4.378	TLE family member 4, transcriptional corepressor(TLE4)
SLC66A2	0.704	0.041	4.762	3.097	4.341	2.822	2.858	2.767	solute carrier family 66 member 2(SLC66A2)
LNX1	0.704	0.004	21.602	23.208	22.664	14.379	15.375	17.93	ligand of numb-protein X 1(Lnx1)
ZFAT	0.704	0.037	1.782	1.774	2.006	1.653	1.121	1.195	zinc finger and AT hook domain containing(Zfat)
TGOLN2	0.706	0.031	8.771	7.681	9.785	5.381	5.806	7.412	trans-golgi network protein 2(Tgoln2)
ATM	0.706	0.005	2.452	2.868	2.684	2.062	1.901	1.697	ATM serine/threonine kinase(ATM)
SLC16A2	0.708	0.033	1.177	1.725	1.569	1.016	0.993	1.115	solute carrier family 16 member 2(SLC16A2)
FKTN	0.709	0.047	2.255	2.331	3.379	1.98	1.833	1.746	fukutin(Fktn)
PNN	0.71	0.002	71.117	72.792	63.362	52.123	45.461	49.522	pinin, desmosome associated protein(PNN)
OARD1	0.71	0.038	1.791	1.508	1.397	0.796	1.352	0.713	O-acyl-ADP-ribose deacylase 1(OARD1)
GRK5	0.71	0.017	19.08	14.74	18.889	12.619	11.273	13.384	G protein-coupled receptor kinase 5(GRK5)
ANO8	0.712	0.023	4.905	3.46	3.952	2.774	2.826	3.087	anoctamin 8(Ano8)
CAPN5	0.712	0.009	37.736	33.786	33.387	25.483	27.751	21.726	calpain 5(CAPN5)
STXBP5	0.713	0.004	15.906	17.283	19.039	11.447	13.033	12.737	syntaxin binding protein 5(STXBP5)
KMT2C	0.714	0.015	75.108	73.042	76.629	48.003	64.271	49.506	lysine (K)-specific methyltransferase 2C(Kmt2c)
KLC2	0.715	0.038	95.046	84.656	65.64	62.15	51.782	60.05	kinesin light chain 2(Klc2)
LONP2	0.716	0.033	8.025	8.147	6.441	4.924	6.403	4.908	lon peptidase 2, peroxisomal(lonp2)
NFYA	0.717	0.028	14.96	13.091	13.869	12.294	8.905	9.146	nuclear transcription factor Y subunit alpha(Nfya)
ARHGEF38	0.717	0.025	22.614	20.509	23.06	15.75	13.322	18.82	Rho guanine nucleotide exchange factor (GEF) 38(Arhgef38)
ASAP3	0.718	0.047	8.291	12.66	11.251	7.331	8.086	7.365	ArfGAP with SH3 domain, ankyrin repeat and PH domain 3(Asap3)
MIDEAS	0.718	0.02	27.692	23.502	30.935	18.112	21.964	18.75	mitotic deacetylase associated SANT domain protein(MIDEAS)
GDA	0.719	0.014	3.695	3.571	2.912	2.524	2.572	2.198	guanine deaminase(Gda)
C16H1ORF116	0.719	0.018	8.87	6.726	7.548	4.977	5.9	5.7	chromosome 16 C1orf116 homolog(C16H1orf116)
FBXO9	0.719	0.036	19.629	16.382	14.464	13.605	12.266	10.37	F-box protein 9(fbxo9)
HMCN1	0.719	0.011	7.316	6.066	6.833	4.733	4.391	5.432	hemicentin 1(Hmcn1)
SHROOM3.L	0.722	0.037	7.65	6.149	6.376	4.657	4.175	5.799	shroom family member 3 L homeolog(shroom3.L)
VCPIP1	0.722	0.027	9.089	8.444	8.351	7.408	5.182	6.283	valosin containing protein (p97)/p47 complex interacting protein 1(Vcpip1)
TEPSIN	0.722	0.001	3.96	3.759	4.128	2.8	2.916	2.835	TEPSIN, adaptor related protein complex 4 accessory protein(Tepsin)
TMEM132E	0.723	0.04	5.921	7.531	6.123	4.02	5.569	4.605	transmembrane protein 132E(tmem132e)
RBM10	0.724	0.016	3.957	4.673	4.571	3.042	2.863	3.675	RNA binding motif protein 10(RBM10)
TMED4	0.725	0.034	2.86	3.335	3.941	2.145	2.48	2.69	transmembrane p24 trafficking protein 4(TMED4)
DSE	0.725	0.002	23.112	22.978	21.963	16.251	17.978	15.215	dermatan sulfate epimerase(DSE)
ESRP1	0.725	0.037	63.716	45.73	46.686	40.292	34.557	37.272	epithelial splicing regulatory protein 1(esrp1)
DAPK3	0.726	0.007	20.059	22.821	17.928	14.667	14.048	15.239	death associated protein kinase 3(DAPK3)
FNTB	0.726	0.02	5.484	6.849	6.821	4.776	5.022	4.089	farnesyltransferase, CAAX box, beta(FNTB)
ATG2B	0.728	0.04	2.758	2.55	2.983	1.733	1.88	2.483	autophagy related 2B(Atg2b)
PITPNC1	0.728	0.013	10.264	12.121	9.782	7.422	8.653	7.314	phosphatidylinositol transfer protein, cytoplasmic 1(pitpnc1)
IDH1	0.728	0.004	13.412	14.962	13.141	10.899	10.015	9.328	isocitrate dehydrogenase (NADP(+)) 1(Idh1)
SIK2	0.73	0.032	33.778	33.761	35.676	20.624	25.741	29.832	salt inducible kinase 2(SIK2)
CASZ1	0.731	0.004	31.43	32.005	35.213	25.01	21.623	25.548	castor zinc finger 1(CASZ1)
CWF19L1	0.731	0.031	11.432	10.225	8.077	7.052	7.635	6.847	CWF19 like cell cycle control factor 1(cwf19l1)
LARP6	0.731	0.021	33.309	28.288	27.894	24.069	18.697	22.828	La ribonucleoprotein domain family, member 6(Larp6)
NIPBLB	0.731	0.035	9.605	7.585	8.326	5.308	7.188	6.214	NIPBL cohesin loading factor b(nipblb)
DEPDC5	0.732	0.043	11.728	13.351	14.952	8.053	10.895	10.477	DEP domain containing 5, GATOR1 subcomplex subunit(DEPDC5)
D17H6S53E	0.733	0.021	12.273	10.505	10.104	9.258	7.527	7.35	DNA segment, Chr 17, human D6S53E(D17H6S53E)
TNFAIP8L2B	0.733	0.019	12.724	11.038	11.324	7.32	8.907	9.598	tumor necrosis factor, alpha-induced protein 8-like 2b(tnfaip8l2b)
SLC46A3	0.733	0.02	7.853	10.159	10.371	6.639	6.756	7.276	solute carrier family 46 member 3(SLC46A3)
NCOR2	0.733	0.026	21.171	20.167	22.849	16.062	18.172	13.182	nuclear receptor co-repressor 2(Ncor2)
NUAK2	0.733	0.005	15.715	13.491	16.491	10.663	11.334	11.41	NUAK family kinase 2(NUAK2)
OSR1	0.734	0.031	18.146	15.816	17.792	12.267	10.864	15.134	odd-skipped related transcription factor 1(osr1)
ARHGEF16	0.735	0.016	16.445	12.417	14.118	11.128	10.106	10.195	Rho guanine nucleotide exchange factor (GEF) 16(Arhgef16)
ECHDC2	0.736	0.002	4.417	4.733	4.724	3.592	3.095	3.542	enoyl-CoA hydratase domain containing 2(ECHDC2)
TFPI2	0.737	0.022	10.115	11.264	12.484	9.145	7.191	8.641	tissue factor pathway inhibitor 2(TFPI2)
USP53	0.737	0.004	22.221	21.198	21.514	17.793	14.631	15.576	ubiquitin specific peptidase 53(Usp53)
ZBTB34	0.737	0.029	10.721	9.23	7.996	6.348	6.529	7.653	zinc finger and BTB domain containing 34(ZBTB34)
ZNF732	0.738	0.033	15.089	17.706	13.984	13.439	10.751	10.38	zinc finger protein 732(ZNF732)
CPEB4	0.738	0.043	70.268	83.799	66.759	59.121	44.907	59.518	cytoplasmic polyadenylation element binding protein 4(CPEB4)
NCOA1	0.738	0.005	10.604	10.951	11.809	7.765	9.107	7.795	nuclear receptor coactivator 1(Ncoa1)
CD163	0.74	0.039	12.493	15.236	14.134	9.841	8.963	12.338	CD163 molecule(CD163)
DMAP1	0.74	0.009	14.784	16.894	16.066	13.286	11.005	11.111	DNA methyltransferase 1 associated protein 1(DMAP1)
SAFB	0.74	0.016	33.464	30.384	39.658	26.99	24.089	25.175	scaffold attachment factor B(Safb)
SLC25A23	0.74	0.003	5.18	5.242	5.674	4.277	3.647	4.009	solute carrier family 25 (mitochondrial carrier; phosphate carrier), member 23(Slc25a23)
KBTBD11	0.741	0.024	2.541	3.147	2.556	2.068	2.237	1.795	kelch repeat and BTB (POZ) domain containing 11(Kbtbd11)
DPF3	0.741	0.007	11.891	12.78	14.502	9.32	10.3	9.338	double PHD fingers 3(dpf3)
SPG11	0.741	0.039	3.437	4.102	3.825	3.278	2.344	2.854	SPG11, spatacsin vesicle trafficking associated(Spg11)
EVC2	0.742	0.04	5.448	6.404	7.711	5.166	4.384	4.843	EvC ciliary complex subunit 2(EVC2)
MBD5	0.742	0.018	6.868	7.866	8.988	5.869	5.443	6.221	methyl-CpG binding domain protein 5(Mbd5)
MLLT10	0.743	0.007	24.883	23.035	27.765	19.325	17.349	19.487	myeloid/lymphoid or mixed-lineage leukemia; translocated to, 10(Mllt10)
FAM126A	0.743	0.012	59.028	46.768	47.785	36.584	37.701	39.277	family with sequence similarity 126 member A(fam126a)
WDR91	0.744	0.032	5.322	5.336	7.12	4.317	4.134	4.66	WD repeat domain 91(wdr91)
APLNRB	0.744	0.001	1.388	1.406	1.34	0.594	0.844	1.076	apelin receptor b(aplnrb)
TPRG1L	0.744	0.03	21.576	17.153	16.66	15.332	13.058	12.689	tumor protein p63 regulated 1 like(TPRG1L)
ANKRD33B	0.745	0.036	3.373	4.613	4.449	2.836	3.149	3.201	ankyrin repeat domain 33B(ANKRD33B)
SERPINA10	0.745	0.044	4.338	3.625	3.683	3.461	2.779	2.49	serine (or cysteine) peptidase inhibitor, clade A (alpha-1 antiproteinase, antitrypsin), member 10(Serpina10)
LRRC8E	0.746	0.028	8.871	8.918	9.113	5.865	8.081	6.302	leucine rich repeat containing 8 VRAC subunit E(LRRC8E)
BCL9	0.747	0.041	10.358	10.643	8.352	6.722	8.493	6.711	BCL9 transcription coactivator(BCL9)
STRN	0.748	0.004	65.405	60.232	64.778	44.158	46.273	52.335	striatin(STRN)
NUP54	0.749	0.01	9.519	9.046	8.586	7.702	6.349	6.363	nucleoporin 54(Nup54)
MVP	0.75	0.045	311.21	259.096	304.187	261.347	190.261	207.695	major vault protein(mvp)
CLDN10	0.75	0.025	4.856	4.319	5.857	3.857	3.532	3.799	claudin 10(CLDN10)
BRDT	0.75	0.049	20.407	21.392	22.529	13.711	15.218	19.866	bromodomain, testis-specific(brdt)
SPART	0.751	0.017	26.478	21.548	26.051	18.358	17.009	20.153	spartin(SPART)
C1GALT1B	0.751	0.018	18.797	23.15	19.997	16.68	13.839	15.997	core 1 synthase, glycoprotein-N-acetylgalactosamine 3-beta-galactosyltransferase, 1b(c1galt1b)
XIAP	0.752	0.01	93.033	90.254	101.825	64.416	70.897	79.702	X-linked inhibitor of apoptosis(xiap)
ARFIP2	0.752	0.001	14.41	14.916	14.178	11.354	11.035	10.356	ADP ribosylation factor interacting protein 2(ARFIP2)
FOXC1B	0.752	0.018	13.28	11.38	14.319	9.137	9.423	10.706	forkhead box C1b(foxc1b)
RNMT	0.752	0.025	30.294	30.741	29.41	26.463	22.774	19.361	RNA (guanine-7-) methyltransferase(rnmt)
MICU1	0.752	0.001	27.574	25.261	27.562	21.275	19.523	19.695	Mitochondrial calcium uptake 1(MICU1)
ETV6	0.754	0.001	50.85	51.973	51.653	39.734	40.522	36.3	ETS variant transcription factor 6(ETV6)
TNFAIP3	0.754	0.02	27.902	28.261	32.266	20.637	20.714	25.535	TNF alpha induced protein 3(TNFAIP3)
PPARA.S	0.757	0.021	2.951	2.419	3.189	2.157	2.225	2.054	peroxisome proliferator activated receptor alpha S homeolog(ppara.S)
METTL26	0.757	0.041	3.895	4.093	3.523	2.676	3.499	2.603	methyltransferase like 26(mettl26)
CEBPD	0.759	0.011	33.027	29.564	31.641	23.665	21.426	26.648	CCAAT enhancer binding protein delta(CEBPD)
TNIP2	0.76	0.045	11.305	15.828	13.216	9.384	10.864	10.174	TNFAIP3 interacting protein 2(TNIP2)
VASP	0.76	0.012	58.046	57.597	63.884	42.361	42.969	51.469	vasodilator stimulated phosphoprotein(VASP)
LYSMD2	0.76	0.001	12.263	12.272	11.839	9.337	9.591	8.748	LysM, putative peptidoglycan-binding, domain containing 2(lysmd2)
DAGLB	0.761	0.016	17.842	17.905	15.566	12.74	14.592	11.769	diacylglycerol lipase, beta(Daglb)
ACP7	0.761	0.046	5.451	6.749	7.758	5.207	4.751	5.08	acid phosphatase 7, tartrate resistant (putative)(acp7)
LRRK1	0.761	0.012	8.198	7.137	8.844	5.806	6.052	6.5	leucine rich repeat kinase 1(LRRK1)
POLD1	0.762	0.016	5.573	6.775	6.054	4.786	5.013	4.22	DNA polymerase delta 1, catalytic subunit(Pold1)
ACACB	0.763	0.022	6.937	7.252	5.626	5.253	4.749	5.031	acetyl-Coenzyme A carboxylase beta(Acacb)
PHKB	0.763	0.036	3.341	3.549	4.182	2.558	2.672	3.218	phosphorylase kinase regulatory subunit beta(PHKB)
PARD3	0.763	0.025	49.432	47.95	47.087	36.71	31.657	42.604	par-3 family cell polarity regulator(PARD3)
NFKBIZ	0.763	0.001	98.977	94.1	104.15	76.539	73.749	76.413	NFKB inhibitor zeta(NFKBIZ)
MIPOL1	0.764	0.028	1.504	1.106	1.35	0.746	0.908	0.831	mirror-image polydactyly 1(MIPOL1)
CLDN8	0.764	0.031	18.999	17.537	17.744	14.935	11.576	15.269	claudin 8(CLDN8)
PIN1	0.765	0.03	80.121	73.894	75.774	68.716	50.878	57.552	peptidylprolyl cis/trans isomerase, NIMA-interacting 1(PIN1)
CC2D1A	0.766	0.036	9.149	10.365	12.053	8.746	7.271	8.08	coiled-coil and C2 domain containing 1A(Cc2d1a)
RAB11FIP5	0.766	0.016	6.814	6.176	5.536	4.309	4.966	4.897	RAB11 family interacting protein 5 (class I)(Rab11fip5)
G3BP2	0.767	0.036	39.41	41.098	41.261	33.487	34.875	25.805	G3BP stress granule assembly factor 2(G3BP2)
DGKA	0.768	0.019	18.383	15.312	16.89	12.321	12.043	14.491	diacylglycerol kinase alpha(DGKA)
LOC109085354	0.77	0.007	36.72	33.828	39.228	27.378	26.668	30.419	ependymin(LOC109085354)
NOX4	0.77	0.008	1.932	1.624	1.843	1.432	1.295	1.424	NADPH oxidase 4(NOX4)
PHC3	0.772	0.021	11.048	9.428	12.31	8.518	8.166	8.488	polyhomeotic 3(Phc3)
MTRES1	0.772	0.031	3.119	2.368	2.951	2.149	2.27	2.058	mitochondrial transcription rescue factor 1(Mtres1)
SLC25A28	0.772	0.007	26.883	29.315	30.98	21.001	22.215	24.117	solute carrier family 25 member 28(slc25a28)
SCAPER	0.773	0.036	3.595	3.667	2.973	2.927	2.63	2.353	S-phase cyclin A associated protein in the ER(SCAPER)
EPC1	0.774	0.013	33.12	39.623	39.495	30.832	28.315	27.539	enhancer of polycomb homolog 1(Epc1)
DHRS7	0.775	0.028	5.352	6.392	5.466	4.188	4.122	5.034	dehydrogenase/reductase 7(DHRS7)
SMC4.L	0.775	0.001	3.038	2.961	2.855	2.39	2.299	2.178	structural maintenance of chromosomes 4 L homeolog(smc4.L)
FEM1A	0.775	0.006	26.06	22.141	25.006	19.613	19.052	17.994	fem-1 homolog a(fem1a)
ALKBH5	0.775	0.009	20.032	16.639	18.217	14.387	13.381	14.702	alkB homolog 5, RNA demethylase(alkbh5)
MSRA	0.776	0.025	4.205	3.506	4.302	2.959	3.415	2.934	methionine sulfoxide reductase A(MSRA)
FAM53B	0.777	0.001	68.116	66.931	72.243	56.872	51.679	52.484	family with sequence similarity 53 member B(fam53b)
CAPN1	0.777	0.011	108.467	107.228	119.058	88.403	94.123	77.99	calpain 1(Capn1)
ADAMTS5	0.778	0.024	11.023	8.474	9.601	7.347	7.311	7.856	a disintegrin-like and metallopeptidase (reprolysin type) with thrombospondin type 1 motif, 5 (aggrecanase-2)(Adamts5)
MTMR4	0.778	0.033	12.055	11.014	9.842	8.28	7.721	9.63	myotubularin related protein 4(MTMR4)
DUS4L	0.779	0.02	10.197	8.028	8.88	7.183	7.217	6.618	dihydrouridine synthase 4 like(DUS4L)
EP300	0.779	0.015	56.477	60.682	68.986	46.178	46.635	51.817	E1A binding protein p300(Ep300)
OSTN	0.779	0.006	1.429	1.228	1.204	0.613	0.688	0.207	osteocrin(OSTN)
H2AFY	0.779	0.013	8.533	7.707	8.739	7.116	5.903	6.478	H2A histone family, member Y(H2AFY)
FKBP5	0.78	0.011	32.361	39.557	36.938	27.01	28.48	29.162	FKBP prolyl isomerase 5(FKBP5)
WDR11	0.781	0.028	3.492	3.584	4.241	2.86	2.707	3.263	WD repeat domain 11(wdr11)
TMEM54	0.781	0.047	28.479	23.93	23.327	22.688	17.794	18.76	transmembrane protein 54(TMEM54)
PQBP1	0.781	0.042	12.967	13.79	11.586	11.155	10.326	8.573	polyglutamine binding protein 1(PQBP1)
TF2-9	0.782	0.015	199.603	222.998	198.859	144.555	169.66	172.908	retrotransposable element(Tf2-9)
PRKAR2A	0.786	0.033	36.641	36.247	42.44	33.508	26.597	30.699	protein kinase cAMP-dependent type II regulatory subunit alpha(PRKAR2A)
GSK3A	0.786	0.029	1.43	1.319	1.091	0.666	0.255	0	glycogen synthase kinase 3 alpha(GSK3A)
MFSD3	0.786	0.029	3.102	3.985	3.622	2.617	2.922	2.847	major facilitator superfamily domain containing 3(Mfsd3)
DHDH.2	0.787	0.022	16.735	18.239	20.822	14.184	13.887	15.727	dihydrodiol dehydrogenase, tandem duplicate 2(dhdh.2)
RABGGTA	0.787	0.021	4.556	5.312	5.255	4.176	4.177	3.556	Rab geranylgeranyltransferase subunit alpha(RABGGTA)
TMEM168A	0.787	0.008	8.284	7.765	8.416	7.015	6.361	5.924	transmembrane protein 168a(tmem168a)
WFS1	0.788	0.005	10.385	10.879	12.188	9.005	8.618	8.678	wolframin ER transmembrane glycoprotein(WFS1)
B4GALT5	0.788	0.035	22.573	25.145	23.934	17.446	17.317	21.995	UDP-Gal:betaGlcNAc beta 1,4- galactosyltransferase, polypeptide 5(b4galt5)
SLC25A14	0.788	0.036	8.812	7.833	8.501	5.764	6.59	7.557	solute carrier family 25 member 14(SLC25A14)
ARID2	0.788	0.022	7.794	8.839	8.151	5.861	7.29	6.434	AT-rich interaction domain 2(ARID2)
MCM4.S	0.788	0.004	3.148	3.514	3.123	2.459	2.56	2.687	minichromosome maintenance complex component 4 S homeolog(mcm4.S)
NAB1	0.789	0.045	17.617	19.091	14.934	15.076	12.596	12.979	NGFI-A binding protein 1(NAB1)
TLCD2	0.791	0.011	17.459	18.975	16.037	14.693	12.98	13.778	TLC domain containing 2(tlcd2)
SSU72	0.791	0.024	50.709	53.695	64.577	43.918	43.492	45.54	SSU72 homolog, RNA polymerase II CTD phosphatase(ssu72)
ERCC3	0.791	0.035	6.773	8.758	7.664	5.744	6.543	5.986	excision repair cross-complementation group 3(ercc3)
TSPAN15	0.791	0.048	17.032	14.207	12.86	11.209	12.541	10.974	tetraspanin 15(Tspan15)
BICRA	0.792	0.028	6.163	5.497	5.208	4.413	4.016	4.939	BRD4 interacting chromatin remodeling complex associated protein(Bicra)
EIF2AK4	0.793	0.028	5.973	6.6	5.642	4.594	5.423	4.447	eukaryotic translation initiation factor 2 alpha kinase 4(EIF2AK4)
KRT8	0.793	0.038	7216.31	5578.8	5954.81	5154.27	4596.13	5043.94	keratin 8(Krt8)
TBC1D8	0.793	0.016	8.687	10.306	10.116	8.155	7.207	7.691	TBC1 domain family member 8(TBC1D8)
LOC110500132	0.793	0.037	1.486	1.133	1.19	0.842	0.968	0.97	shaker-related potassium channel tsha2(LOC110500132)
RPS6KAL	0.794	0.019	26.212	30.923	28.583	20.616	23.128	24.303	ribosomal protein S6 kinase a, like(rps6kal)
CYSLTR1	0.795	0.022	7.657	7.624	8.812	5.734	6.707	6.711	cysteinyl leukotriene receptor 1(Cysltr1)
CYP27A1	0.797	0.033	12.456	10.125	10.681	9.332	7.983	9.16	sterol 26-hydroxylase, mitochondrial(CYP27A1)
CNST	0.798	0.035	12.815	12.617	11.735	9.762	11.326	8.72	consortin, connexin sorting protein(CNST)
KMT2E	0.798	0.017	19.902	18.51	16.658	13.576	15.434	14.883	lysine (K)-specific methyltransferase 2E(Kmt2e)
BNIPL	0.798	0.024	41.607	36.787	34.981	31.854	27.277	31.332	BCL2/adenovirus E1B 19kD interacting protein like(Bnipl)
GPATCH8	0.799	0.02	67.702	82.697	70.595	59.371	61.069	55.591	G patch domain containing 8(Gpatch8)
RUNX1	0.8	0.037	14.777	16.196	18.267	13.489	11.799	14.046	RUNX family transcription factor 1(RUNX1)
MTNR1AA	0.8	0.028	1.301	1.082	1.38	0.413	0.792	0.179	melatonin receptor 1A a(mtnr1aa)
CD2BP2	0.8	0.032	10.472	11.285	10.62	9.876	8.523	7.678	CD2 cytoplasmic tail binding protein 2(Cd2bp2)
CAST	0.8	0.042	151.262	121.301	118.226	109.867	100.71	101.162	calpastatin(CAST)
MCM6	0.8	0.004	2.01	2.179	2.303	1.794	1.73	1.687	minichromosome maintenance complex component 6(Mcm6)
DENND2C	0.8	0.002	20.764	21.688	20.703	16.538	18.001	16.272	DENN domain containing 2C(DENND2C)
WDR77	0.8	0.019	10.998	9.193	10.386	8.483	8.483	7.597	WD repeat domain 77(WDR77)
UGT2A1	0.8	0.023	20.487	21.827	21.331	15.214	19.041	17.189	UDP glucuronosyltransferase family 2 member A1 complex locus(UGT2A1)
MTPN	0.8	0.014	112.202	110.837	112.305	99.756	81.551	89.688	myotrophin(mtpn)
DGKH	0.8	0.026	26.988	22.874	23.848	19.344	21.689	18.342	diacylglycerol kinase, eta(Dgkh)
HNRNPUL1	0.8	0.007	110.309	99.597	112.345	82.167	86.202	91.348	heterogeneous nuclear ribonucleoprotein U-like 1(Hnrnpul1)
NDUFB4	0.8	0.02	31.275	31.087	29.826	22.202	27.524	24.974	NADH:ubiquinone oxidoreductase subunit B4(NDUFB4)
ADARB1	0.8	0.004	7.74	7.995	8.318	6.551	6.837	6.053	adenosine deaminase, RNA-specific, B1(Adarb1)
ERG	0.8	0.031	7.447	6.572	8.208	6.181	6.149	5.576	ETS transcription factor ERG(ERG)
TMEM164	0.8	0.045	16.238	15.82	13.867	10.847	13.502	12.836	transmembrane protein 164(TMEM164)
ABHD8.L	0.8	0.015	2.159	2.204	2.318	1.844	1.618	1.95	abhydrolase domain containing 8 L homeolog(abhd8.L)
AIFM1	0.8	0.028	11.021	13.424	11.453	9.516	10.306	9.12	apoptosis inducing factor mitochondria associated 1(AIFM1)
PHTF2	0.8	0.017	15.22	12.516	13.9	11.577	10.736	11.247	putative homeodomain transcription factor 2(PHTF2)
CPVL	0.8	0.012	4.906	5.659	5.646	4.165	4.609	4.311	carboxypeptidase vitellogenic like(CPVL)
HDAC11	0.8	0.024	1.26	1.092	1.377	0.763	0.481	0.453	histone deacetylase 11(HDAC11)
ATG4D	0.8	0.027	14.122	16.703	14.201	11.111	12.692	12.55	autophagy related 4D, cysteine peptidase(Atg4d)
DHTKD1	0.8	0.05	13.01	15.25	17.353	11.988	12.496	12.182	dehydrogenase E1 and transketolase domain containing 1(dhtkd1)
CASP6	0.8	0.009	28.924	30.321	30.432	22.779	26.602	23.386	caspase 6(Casp6)
RENBP	0.8	0.012	4.017	4.693	4.261	3.312	3.67	3.517	renin binding protein(RENBP)
ACSBG2.L	0.8	0.001	44.321	45.712	44.005	35.892	36.153	36.608	acyl-CoA synthetase bubblegum family member 2 L homeolog(acsbg2.L)
ABCB10	0.8	0.043	2.22	2.206	2.154	1.852	1.529	1.99	ATP-binding cassette, sub-family B (MDR/TAP), member 10(Abcb10)
ARL4C	0.8	0.038	11.765	9.406	11.372	8.701	8.372	9.257	ADP-ribosylation factor-like 4C(Arl4c)
PALS1A	0.8	0.041	45.602	36.566	43.607	31.759	36.138	34.126	protein associated with LIN7 1, MAGUK p55 family member a(pals1a)
TTC14	0.8	0.04	6.041	7.219	7.431	5.292	6.048	5.457	tetratricopeptide repeat domain 14(TTC14)
PCF11	0.8	0.036	52.308	66.1	56.902	46.727	45.586	49.833	PCF11 cleavage and polyadenylation factor subunit(PCF11)
ELF4	0.8	0.046	22.016	27.94	23.265	18.623	20.409	20.519	E74 like ETS transcription factor 4(ELF4)
NIPSNAP2	0.8	0.026	22.748	22.695	22.758	21.149	17.606	17.225	nipsnap homolog 2(nipsnap2)
DHRS13	0.8	0.038	144.942	116.324	122.268	110.321	98.966	103.137	dehydrogenase/reductase 13(DHRS13)
OVOL1	0.8	0.039	22.236	18.502	17.437	15.413	16.07	15.832	ovo like zinc finger 1(Ovol1)
TAF2	0.8	0.048	3.556	4.484	3.843	3.448	3.003	3.239	TAF2 RNA polymerase II, TATA box binding protein (TBP)-associated factor(taf2)
RNF19A	0.8	0.048	31.633	34.956	38.891	26.084	29.285	30.987	ring finger protein 19A(Rnf19a)
NFKBIA	0.8	0.037	247.615	239.916	287.995	221.071	193.27	220.447	NFKB inhibitor alpha(NFKBIA)
TBC1D10B	0.8	0.013	16.843	17.625	19.524	15.564	14.631	14.038	TBC1 domain family member 10B(TBC1D10B)
DAB2IP	0.8	0.018	26.756	26.611	28.38	22.375	20.365	24.51	disabled 2 interacting protein(Dab2ip)
GMEB1	0.8	0.004	10.083	10.926	11.406	8.795	9.007	8.773	glucocorticoid modulatory element binding protein 1(Gmeb1)
BCKDHB	0.8	0.021	12.485	11.38	12.184	8.964	10.756	9.968	branched chain keto acid dehydrogenase E1 subunit beta(BCKDHB)
SLIT1	0.8	0.001	9.091	9.992	9.645	7.813	7.885	7.909	slit guidance ligand 1(SLIT1)
DYRK1B	0.8	0.018	6.851	7.336	7.029	5.28	6.327	5.894	dual-specificity tyrosine-(Y)-phosphorylation regulated kinase 1b(Dyrk1b)
AKT2	0.8	0.031	35.951	39.183	36.923	32.854	32.582	27.26	AKT serine/threonine kinase 2(AKT2)
PLEK	0.8	0.017	8.149	9.388	8.366	7.457	7.24	6.655	pleckstrin(PLEK)
KIAA2013	0.8	0.017	11.971	10.909	10.607	9.191	9.891	8.571	KIAA2013(kiaa2013)
GBP2	0.8	0.026	63.605	56.767	62.02	50.194	45.802	54.791	guanylate binding protein 2(GBP2)
IGF2BP2	0.8	0.024	56.877	53.603	48.499	42.676	47.147	41.484	insulin like growth factor 2 mRNA binding protein 2(IGF2BP2)
CELF2	0.8	0.033	5.364	5.521	5.457	4.464	5.077	4.05	CUGBP, Elav-like family member 2(celf2)
PMEPA1.L	0.8	0.013	35.544	35.046	36.881	28.929	27.843	32.577	prostate transmembrane protein, androgen induced 1 L homeolog(pmepa1.L)
RELCH	0.8	0.001	23.667	23.885	24.775	20.402	19.493	20.22	RAB11 binding and LisH domain, coiled-coil and HEAT repeat containing(relch)
XRCC5	0.8	0.011	4.007	4.374	4.417	3.412	3.8	3.433	X-ray repair cross complementing 5(XRCC5)
GRAMD2B	0.8	0.002	17.596	18.583	18.823	15.269	14.764	15.789	GRAM domain containing 2B(Gramd2b)
AUH	0.8	0.023	4.536	4.634	4.38	3.927	3.378	4.014	AU RNA binding methylglutaconyl-CoA hydratase(AUH)
AMOT	0.8	0.024	11.829	12.991	13.926	10.055	11.136	11.06	angiomotin(AMOT)
